# Supplementary material for: Angiomotin binding-induced activation of Merlin/NF2 in the Hippo pathway
Source: PubMed Central journal article supplement — Cell Res. 2015 Jun 5;25(7):801–17. doi: 10.1038/cr.2015.69 (PMC4493278; doi:10.1038/cr.2015.69), 2015-06-05
Supplement: cr201569x1.pdf [file cr201569x1.pdf]

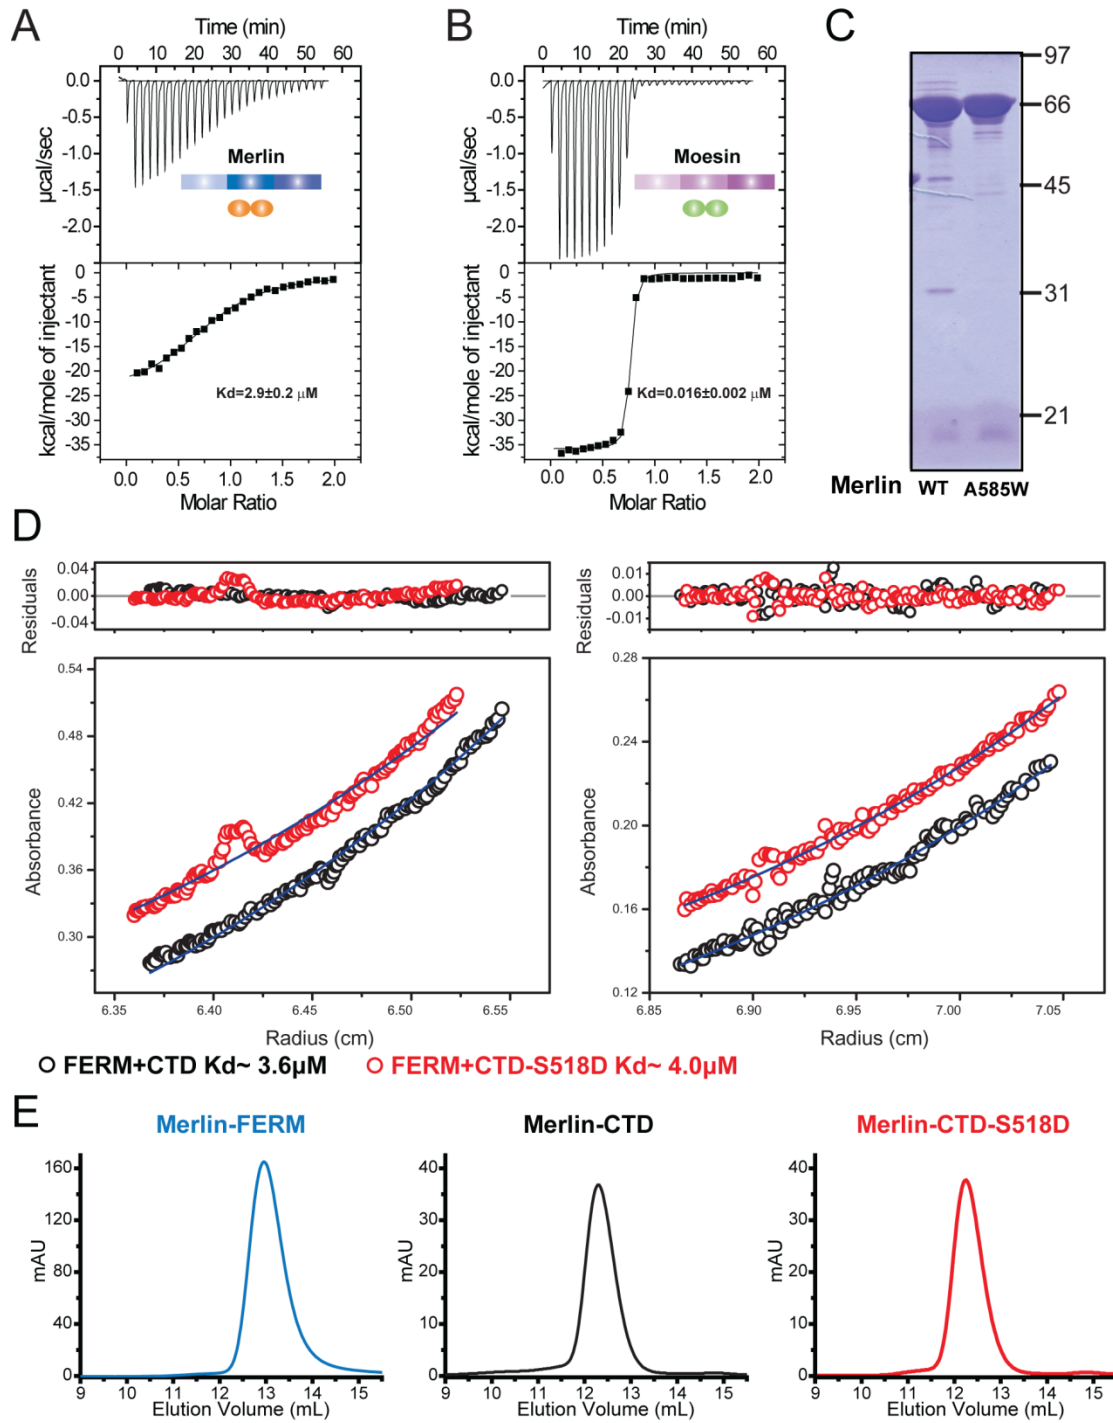

**Supplementary information, Figure S1. Head-to-tail auto-inhibition of Merlin and ERMs.**

(A-B) ITC-based measurements of the FERM/CTD interaction in Merlin (A) and Moesin (B).

(C) SDS-PAGE with Coomassie blue staining showing the quality of WT-Merlin and

A585W-Merlin used in the biochemical analyses throughout the study.

(D) Analytical ultracentrifugation shows phosphorylation mimetic mutation has no impact on the Merlin FERM/CTD interaction. In this assay, two different protein concentrations are used. Both in high (left panel) and low (right panel) protein concentrations, the Merlin S518D-CTD (labeled in red) displayed an almost identical profile and dissociation constant ( $K_d$  of  $\sim 4.0 \mu\text{M}$ ) as WT-CTD (labeled in black) in binding to its FERM domain.

(E) The analytical gel filtration profiles of the proteins used for the analytical ultracentrifugation analysis shown in *panel D*.
