# Supplementary material for: Angiomotin binding-induced activation of Merlin/NF2 in the Hippo pathway
Source: PubMed Central journal article supplement — Cell Res. 2015 Jun 5;25(7):801–17. doi: 10.1038/cr.2015.69 (PMC4493278; doi:10.1038/cr.2015.69), 2015-06-05
Supplement: cr201569x2.pdf [file cr201569x2.pdf]

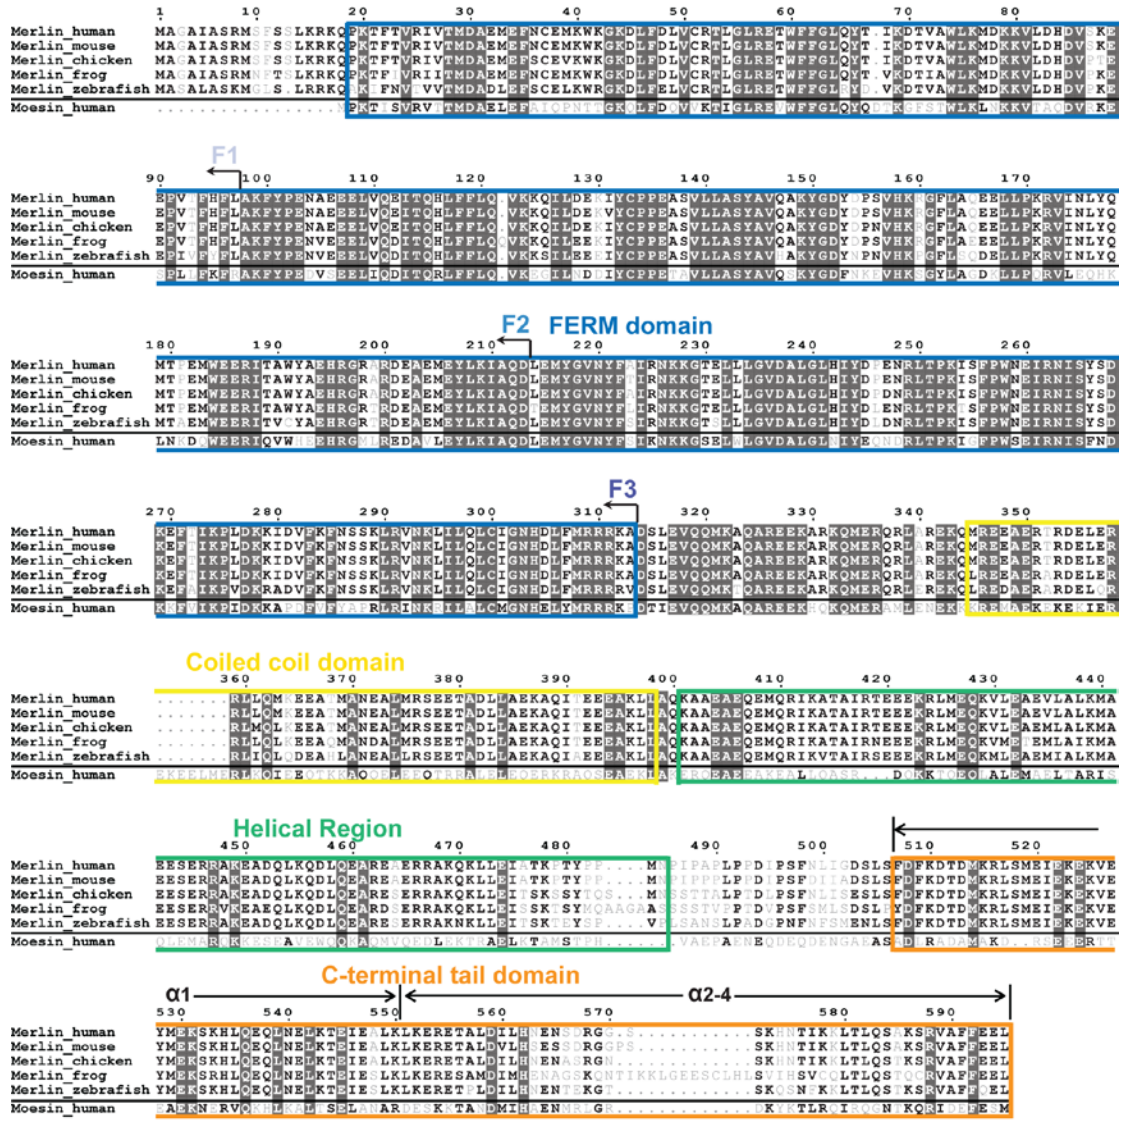

Supplementary information, Figure S2. Sequence alignment of the full length Merlin across different species and with human Moesin. The domains are boxed with the same color code as in Figure 1.
