# Supplementary material for: Angiomotin binding-induced activation of Merlin/NF2 in the Hippo pathway
Source: PubMed Central journal article supplement — Cell Res. 2015 Jun 5;25(7):801–17. doi: 10.1038/cr.2015.69 (PMC4493278; doi:10.1038/cr.2015.69), 2015-06-05
Supplement: cr201569x4.pdf [file cr201569x4.pdf]

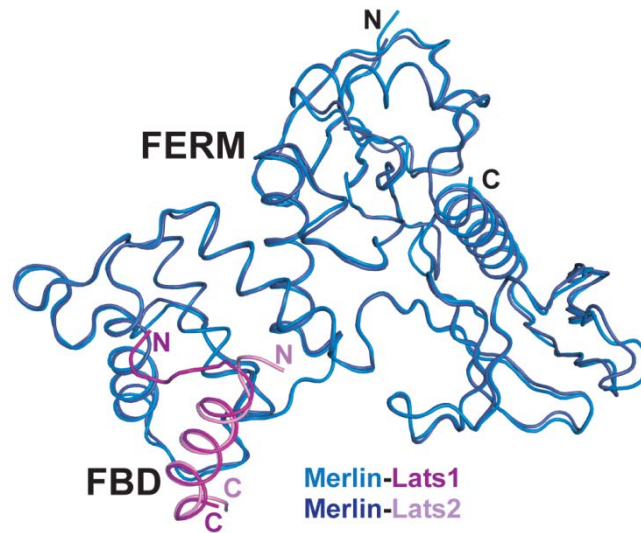

**Supplementary information, Figure S4. Comparison of the structures of the Merlin-FERM/Lats1 and Merlin-FERM/Lats2 complexes.**
