# Supplementary material for: Angiomotin binding-induced activation of Merlin/NF2 in the Hippo pathway
Source: PubMed Central journal article supplement — Cell Res. 2015 Jun 5;25(7):801–17. doi: 10.1038/cr.2015.69 (PMC4493278; doi:10.1038/cr.2015.69), 2015-06-05
Supplement: cr201569x5.pdf [file cr201569x5.pdf]

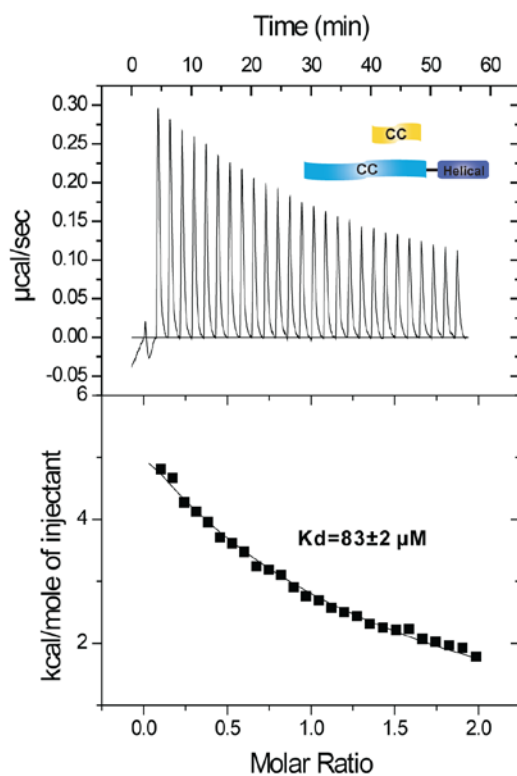

**Supplementary information, Figure S5. ITC-based assay of the binding between the Merlin helical region (residues 401-485) to AMOT-CC showing that the Merlin helical region indeed binds to AMOT, albeit with a relatively weak affinity.**
