# Supplementary material for: Angiomotin binding-induced activation of Merlin/NF2 in the Hippo pathway
Source: PubMed Central journal article supplement — Cell Res. 2015 Jun 5;25(7):801–17. doi: 10.1038/cr.2015.69 (PMC4493278; doi:10.1038/cr.2015.69), 2015-06-05
Supplement: cr201569x6.pdf [file cr201569x6.pdf]

|              |                                                                                   |   |
|--------------|-----------------------------------------------------------------------------------|---|
| PAK1         | +                                                                                 | + |
| WT-Merlin    | +                                                                                 | - |
| S518A-Merlin | -                                                                                 | + |
| IB: GFP      |  |   |
| IB: p-S518   |  |   |

**Supplementary information, Figure S6. Ser518 of Merlin can be specifically phosphorylated by PAK1.**

Top panel shows Western Blot analysis of GFP-tagged WT-Merlin and S518A-Merlin in the HEK293 cell lysate each co-expressed with the constitutively active form of PAK1. The bottom panel shows that only WT-Merlin is specifically phosphorylated by PAK1 using a p-S518 specific antibody to Merlin.
