# Supplementary material for: Angiomotin binding-induced activation of Merlin/NF2 in the Hippo pathway
Source: PubMed Central journal article supplement — Cell Res. 2015 Jun 5;25(7):801–17. doi: 10.1038/cr.2015.69 (PMC4493278; doi:10.1038/cr.2015.69), 2015-06-05
Supplement: cr201569x7.pdf [file cr201569x7.pdf]

**Supplementary information, Table S1** Statistics of data collection and model refinement

|                                                       | FERM/CTD               | FERM/Lats1                | FERM/Lats2                               |
|-------------------------------------------------------|------------------------|---------------------------|------------------------------------------|
| <b>Data collection</b>                                |                        |                           |                                          |
| X-ray source                                          | Photon Factory         | SSRF                      | SSRF                                     |
| Space group                                           | $P2_12_12_1$           | $P2_12_12_1$              | $P2_1$                                   |
| Unit cell parameters (Å)                              | $a=67.9;b=68.2;c=82.3$ | $a=111.1;b=110.8;c=168.7$ | $a=63.0;b=100.5;c=65.0$<br>$\beta=105.9$ |
| Resolution range (Å)                                  | 50-2.3(2.37-2.3)       | 50-2.3(2.38-2.3)          | 50-2.7(2.79-2.7)                         |
| No. of unique reflections                             | 17,339(1,639)          | 89,074(8,835)             | 21,376(2,014)                            |
| Redundancy                                            | 7.2(6.6)               | 5.9(5.6)                  | 3.8(3.5)                                 |
| $I/\sigma$                                            | 26.3(7.3)              | 28.1(2.5)                 | 20.4(2.2)                                |
| Completeness (%)                                      | 99.5(98.6)             | 99.4(99.8)                | 99.3(95.0)                               |
| $R_{\text{merge}}$ (%) <sup>a</sup>                   | 7.3(23.9)              | 6.1(77.5)                 | 6.0(40.6)                                |
| <b>Structure refinement</b>                           |                        |                           |                                          |
| Resolution (Å)                                        | 50-2.3(2.37-2.3)       | 50-2.3(2.34-2.3)          | 50-2.7(2.82-2.7)                         |
| $R_{\text{cryst}} / R_{\text{free}}$ (%) <sup>b</sup> | 19.3/24.8              | 24.7/27.9                 | 22.9/27.0                                |
| r.m.s.d bonds (Å) / angles (°)                        | 0.008/1.1              | 0.01/1.2                  | 0.01/1.3                                 |
| Average B factor                                      | 21.6                   | 56.4                      | 57.6                                     |
| No. of atoms                                          |                        |                           |                                          |
| Protein atoms                                         | 3,045                  | 10,271                    | 4,972                                    |
| Water molecules                                       | 107                    | 33                        | 3                                        |
| Ramachandran plot <sup>c</sup>                        |                        |                           |                                          |
| favored regions(%)                                    | 98.4                   | 97.9                      | 93.8                                     |
| allowed regions(%)                                    | 1.3                    | 1.9                       | 6.0                                      |
| outliners(%)                                          | 0.3                    | 0.2                       | 0.2                                      |

<sup>a</sup>  $R_{\text{merge}} = \sum |I_i - I_m| / \sum I_i$ , where  $I_i$  is the intensity of the measured reflection and  $I_m$  is the mean intensity of all symmetry related reflections.

<sup>b</sup>  $R_{\text{cryst}} = \sum ||F_{\text{obs}}| - |F_{\text{calc}}|| / \sum |F_{\text{obs}}|$ , where  $F_{\text{obs}}$  and  $F_{\text{calc}}$  are observed and calculated structure factors.

$R_{\text{free}} = \sum_T ||F_{\text{obs}}| - |F_{\text{calc}}|| / \sum_T |F_{\text{obs}}|$ , where T is a test data set of about 5-10% of the total reflections randomly chosen and set aside prior to refinement.

<sup>c</sup> Defined by MolProbity.

Numbers in parentheses represent the value for the highest resolution shell.
